# Supplementary material for: Local Translation in Perisynaptic Astrocytic Processes Is Specific and Changes after Fear Conditioning
Source: PubMed Central journal article supplement — Cell Rep. 2020 Aug 25;32(8):108076. doi: 10.1016/j.celrep.2020.108076 (PMC7450274; doi:10.1016/j.celrep.2020.108076), 2020-08-25
Supplement: mmc1.pdf [file mmc1.pdf]

**Cell Reports, Volume 32**

**Supplemental Information**

**Local Translation in Perisynaptic**

**Astrocytic Processes Is Specific**

**and Changes after Fear Conditioning**

**Noémie Mazaré, Marc Oudart, Julien Moulard, Giselle Cheung, Romain Tortuyaux, Philippe Mailly, David Mazaud, Alexis-Pierre Bemelmans, Anne-Cécile Boulay, Corinne Blugeon, Laurent Jourden, Stéphane Le Crom, Nathalie Rouach, and Martine Cohen-Salmon**

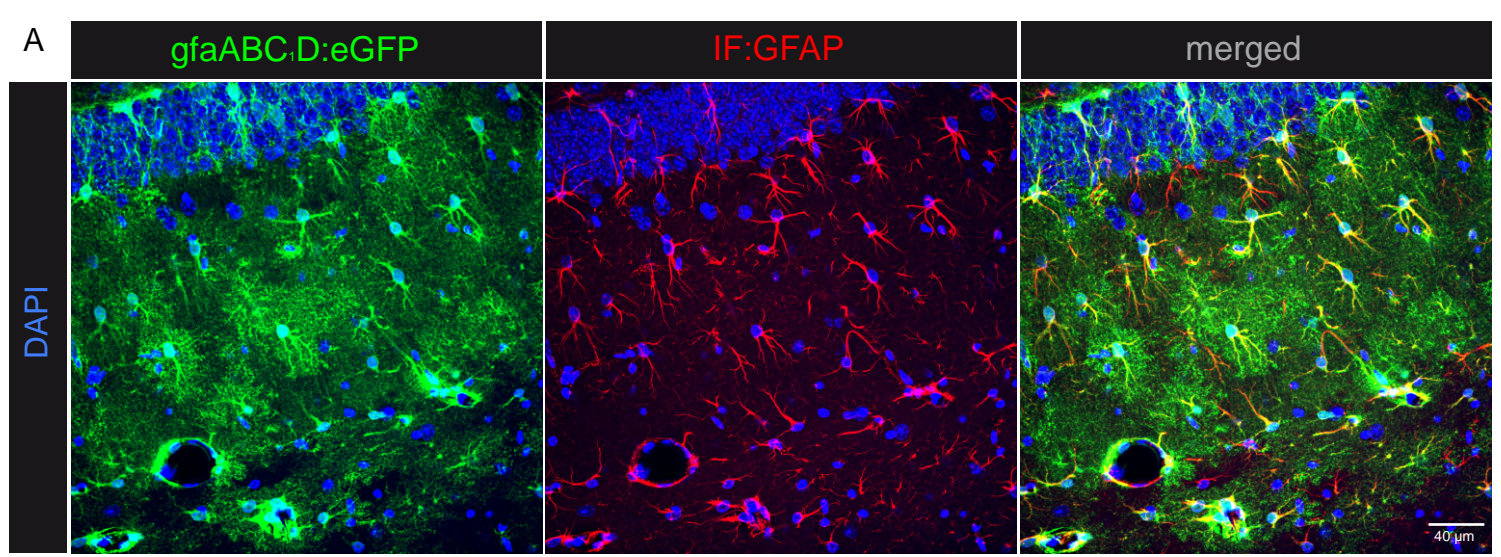

**Figure S1: Specificity of the AAV gfaABC<sub>1</sub>D-eGFP infection in astrocytes.** *Related to figure 1.* Hippocampal astrocytes are immunostained with GFP (green) and GFAP (red). Nuclei are stained with DAPI (blue).

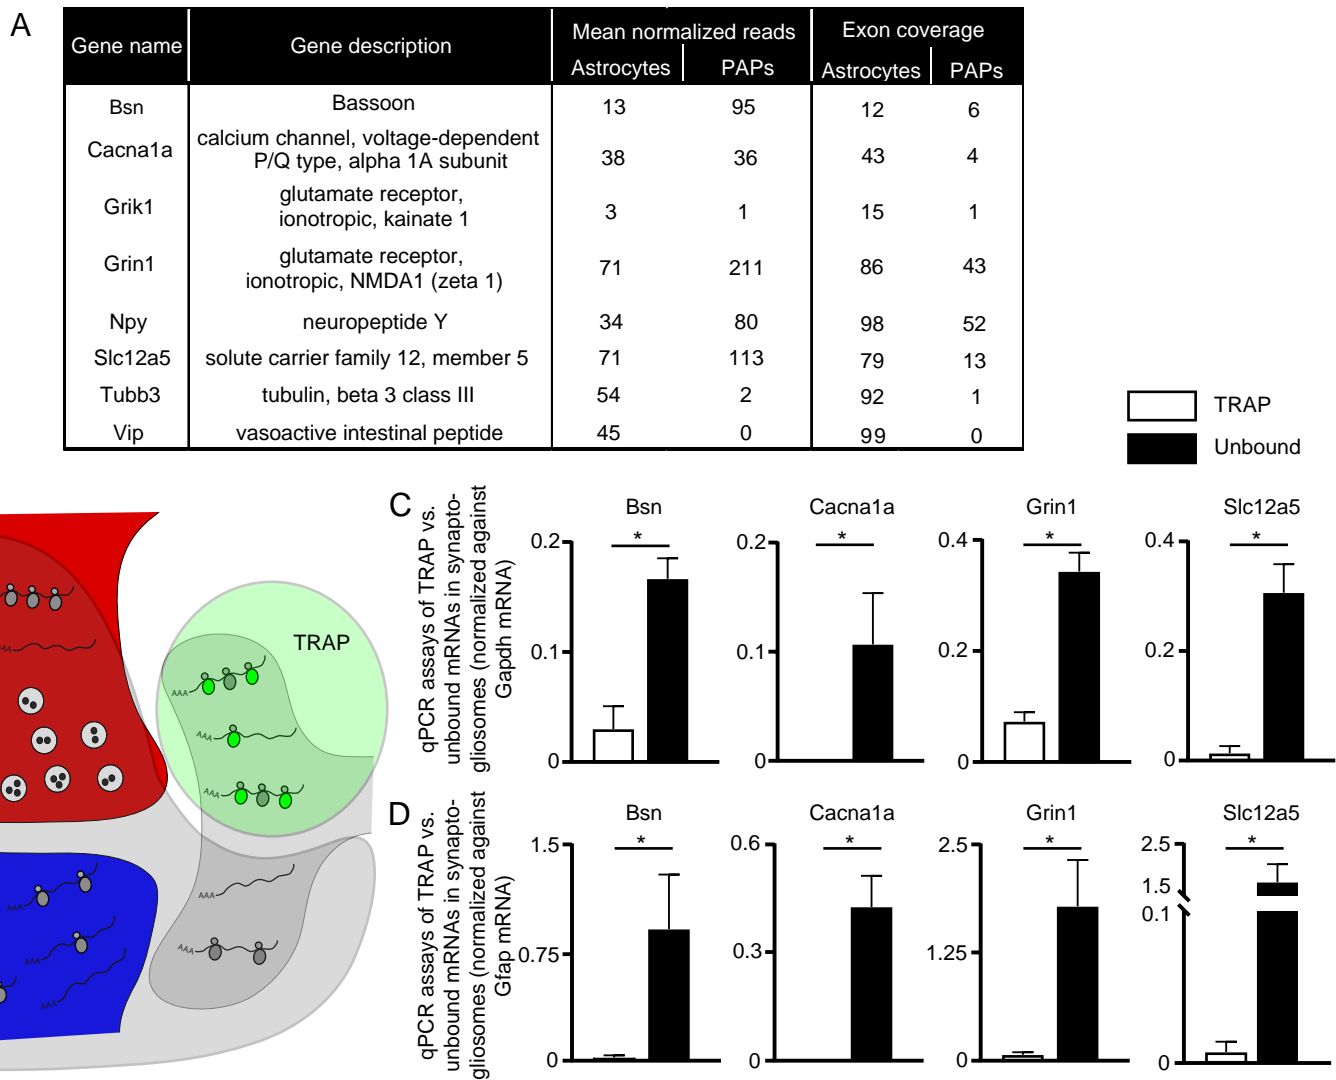

**Figure S2: Absence of neuronal-specific mRNAs contamination in TRAP libraries.** Related to figure 2. **A.** Raw RNA-seq data for neuronal-specific mRNAs from dorsal hippocampal astrocyte-TRAP and PAP-TRAP. **B.** Schematic representation of the different synaptogliosome contents extracted for analysis in C and D. **C. D.** Quantitative PCR analysis of some neuronal-specific genes in the PAP-TRAP immunoprecipitated fraction compared to the unbound fraction from hippocampal synaptogliosomes, normalized on the ubiquitous Gapdh mRNA (C) and the astrocyte-specific Gfap mRNA (D). SEM: standard error of the mean; \*,  $p \leq 0.05$ ;  $n = 3$ ; one-tailed Mann-Whitney test.

| Gene Name | Astrocyte polysomal mRNAs |           |           |      |      | PAP polysomal mRNAs |           |           |          |         | p-value | significance |
|-----------|---------------------------|-----------|-----------|------|------|---------------------|-----------|-----------|----------|---------|---------|--------------|
|           | extract 1                 | extract 2 | extract 3 | Mean | SEM  | extract 1           | extract 2 | extract 3 | Mean     | SEM     |         |              |
| Fth1      | 4,55                      | 1,29      | 3,45      | 3,10 | 0,96 | 63,67               | 81,66     | 19,86     | 55,06    | 18,35   | 0,05    | *            |
| Ftl1      | 0,13                      | 0,05      | 0,11      | 0,10 | 0,02 | 95,14               | 75,54     | 15,76     | 62,15    | 23,87   | 0,05    | *            |
| Ezr       | 0,06                      | 0,04      | 0,2       | 0,10 | 0,05 | 11,78               | 15,6      | 3,15      | 10,18    | 3,68    | 0,05    | *            |
| Gnb211    | 0,45                      | 0,58      | 0,97      | 0,67 | 0,16 | 125,7               | 87,13     | 42,08     | 84,97    | 24,16   | 0,05    | *            |
| Rpl8      | 1,54                      | 0,94      | 1,72      | 1,40 | 0,24 | 168,06              | 102,36    | 48,8      | 106,41   | 34,49   | 0,05    | *            |
| Eef1a1    | 4,08                      | 3,76      | 5,19      | 4,34 | 0,43 | 26667,84            | 309,58    | 13384,88  | 13454,10 | 7609,05 | 0,05    | *            |
| Eef2      | 0,92                      | 0,64      | 1,51      | 1,02 | 0,26 | 120,34              | 120,7     | 89,12     | 110,05   | 10,47   | 0,05    | *            |
| Rdx       | 0                         | 0,03      | 0,05      | 0,03 | 0,01 | 7,02                | 9,29      | 2,51      | 6,27     | 1,99    | 0,05    | *            |
| Rplp1     | 2,85                      | 3,3       | 6,61      | 4,25 | 1,19 | 299,1               | 296,49    | 72,7      | 222,76   | 75,04   | 0,05    | *            |
| Rpl4      | 0,82                      | 0,92      | 1,58      | 1,11 | 0,24 | 257,02              | 56,67     | 300       | 204,56   | 74,98   | 0,05    | *            |
| Rps14     | 0,08                      | 0,06      | 0,18      | 0,11 | 0,04 | 3,6                 | 2,93      | 1,8       | 2,78     | 0,53    | 0,05    | *            |
| Rps3      | 0,9                       | 0,87      | 1,76      | 1,18 | 0,29 | 220,49              | 178,38    | 38,69     | 145,85   | 54,94   | 0,05    | *            |
| Ccnd2     | 0,08                      | 0,4       | 0,4       | 0,29 | 0,11 | 74,3                | 71,71     | 37,73     | 61,25    | 11,78   | 0,05    | *            |
| Hsp90     | 1,08                      | 0,75      | 0,98      | 0,94 | 0,10 | 70,97               | 48,28     | 19,9      | 46,38    | 14,77   | 0,05    | *            |
| Mdm2      | 0,02                      | 0,02      | 0,01      | 0,02 | 0,00 | 24,36               | 17,61     | 9,05      | 17,01    | 4,43    | 0,05    | *            |
| Ncl       | 0,05                      | 0,15      | 0,15      | 0,12 | 0,03 | 106,9               | 92,14     | 22,74     | 73,93    | 25,95   | 0,05    | *            |
| Npm1      | 0,6                       | 0,14      | 0,26      | 0,33 | 0,14 | 95,97               | 87,93     | 31,31     | 71,74    | 20,35   | 0,05    | *            |

**Table S2: qPCR analysis of ribosome-bound mRNAs in whole astrocytes and PAPs from the dorsal hippocampus. Related to figure 3.** SEM: standard error of the mean;

\*,  $p \leq 0.05$ ;  $n = 3$ ; one-tailed Mann-Whitney test.

| Gene name | PvAP polysomal mRNAs |           |           |       |       | PAP polysomal mRNAs |           |           |       |      | p-value | significance | Enrichment |
|-----------|----------------------|-----------|-----------|-------|-------|---------------------|-----------|-----------|-------|------|---------|--------------|------------|
|           | Extract 1            | Extract 2 | Extract 3 | Mean  | SEM   | Extract 1           | Extract 2 | Extract 3 | Mean  | SEM  |         |              |            |
| Ezr       | 1,42                 | 1,61      | 1,29      | 1,44  | 0,09  | 3,64                | 3,00      | 3,15      | 3,26  | 0,19 | 0,05    | *            | PAP        |
| Fth1      | 4,33                 | 4,11      | 6,14      | 4,86  | 0,64  | 8,33                | 7,67      | 18,40     | 11,47 | 3,47 | 0,05    | *            | PAP        |
| Rpl1      | 6,18                 | 4,94      | 4,78      | 5,30  | 0,44  | 7,56                | 10,79     | 14,38     | 10,91 | 1,97 | 0,05    | *            | PAP        |
| Ftl1      | 1,45                 | 1,20      | 0,64      | 1,10  | 0,24  | 0,64                | 0,99      | 3,36      | 1,66  | 0,85 | 0,5     | ns           | None       |
| Gnb2l1    | 2,06                 | 1,92      | 0,90      | 1,63  | 0,37  | 1,18                | 0,76      | 3,96      | 1,97  | 1,00 | 0,5     | ns           | None       |
| Hsp90     | 6,17                 | 4,54      | 4,56      | 5,09  | 0,54  | 1,51                | 0,43      | 9,32      | 3,75  | 2,80 | 0,35    | ns           | None       |
| Ncl       | 0,62                 | 1,35      | 1,01      | 0,99  | 0,21  | 0,47                | 0,31      | 2,86      | 1,21  | 0,82 | 0,35    | ns           | None       |
| Npm       | 2,25                 | 7,22      | 1,96      | 3,81  | 1,71  | 3,06                | 0,98      | 5,39      | 3,14  | 1,27 | 0,5     | ns           | None       |
| Rdx       | 2,24                 | 15,17     | 3,14      | 6,85  | 4,17  | 3,00                | 1,21      | 5,80      | 3,34  | 1,34 | 0,35    | ns           | None       |
| Eef2      | 13,48                | 43,79     | 11,03     | 22,77 | 10,54 | 18,75               | 5,56      | 27,18     | 17,16 | 6,29 | 0,5     | ns           | None       |
| Rpl4      | 0,89                 | 1,57      | 1,44      | 1,30  | 0,21  | 0,71                | 0,43      | 4,46      | 1,87  | 1,30 | 0,5     | ns           | None       |
| Rpl8      | 5,90                 | 3,51      | 2,00      | 3,80  | 1,14  | 2,65                | 2,10      | 11,81     | 5,52  | 3,15 | 0,5     | ns           | None       |
| Rps14     | 0,89                 | 1,57      | 1,44      | 1,30  | 0,21  | 0,71                | 0,43      | 4,46      | 1,87  | 1,30 | 0,35    | ns           | None       |
| Rps3      | 0,17                 | 0,12      | 0,05      | 0,11  | 0,03  | 0,17                | 0,22      | 1,22      | 0,54  | 0,34 | 0,1     | ns           | None       |

**Table S3: qPCR analysis of ribosome-bound mRNAs in PAPs and PvAPs from the hippocampus. Related to figure 4.** SEM: standard error of the mean; \*,  $p \leq 0.05$ , ns: not significant;  $n = 3$ ; one-tailed Mann-Whitney test.

| Gene name | Density  |           |          |           |         |              | Distribution in Soma |        |        |        |         |              |
|-----------|----------|-----------|----------|-----------|---------|--------------|----------------------|--------|--------|--------|---------|--------------|
|           | Control  |           | Fear     |           | p-value | Significance | Control              |        | Fear   |        | p-value | Significance |
|           | Mean     | SEM       | Mean     | SEM       |         |              | Mean                 | SEM    | Mean   | SEM    |         |              |
| Ccnd2     | 0,0064   | 0,0008    | 0,0070   | 0,0007    | <0,0001 | ****         | 7,7220               | 0,5279 | 7,3100 | 0,6611 | 0,1500  | ns           |
| Ftl1      | 0,01281  | 0,001122  | 0,01003  | 0,0005351 | 0,0282  | *            | 10,61                | 0,7933 | 12,57  | 0,7321 | 0,0719  | ns           |
| Fth1      | 0,1024   | 0,003867  | 0,09257  | 0,006674  | 0,2     | ns           | 3,883                | 0,2967 | 6,98   | 0,5634 | <0,0001 | ****         |
| Eef1a1    | 0,0593   | 0,00307   | 0,04545  | 0,001985  | 0,0007  | ***          | 7,636                | 0,5853 | 7,15   | 0,6849 | 0,5911  | ns           |
| Mdm2      | 0,006992 | 0,0007308 | 0,002771 | 0,0002454 | <0,0001 | ****         | 6,366                | 0,5433 | 7,743  | 0,781  | 0,1504  | ns           |
| Gnb2l1    | 0,007999 | 0,0005569 | 0,006569 | 0,000348  | 0,0327  | *            | 8,517                | 0,6932 | 13,16  | 1,102  | 0,0006  | ***          |

| Gene name | Distribution in Large Processes |        |       |        |         |              | Distribution in Fine Processes |        |       |        |         |              |
|-----------|---------------------------------|--------|-------|--------|---------|--------------|--------------------------------|--------|-------|--------|---------|--------------|
|           | Control                         |        | Fear  |        | p-value | Significance | Control                        |        | Fear  |        | p-value | Significance |
|           | Mean                            | SEM    | Mean  | SEM    |         |              | Mean                           | SEM    | Mean  | SEM    |         |              |
| Ccnd2     | 16,21                           | 1,001  | 12,82 | 0,6692 | 0,0024  | **           | 76,07                          | 1,179  | 79,87 | 0,9033 | 0,0008  | ***          |
| Ftl1      | 8,83                            | 0,6126 | 10,89 | 0,7023 | 0,0288  | *            | 80,56                          | 0,896  | 76,54 | 0,9856 | 0,0037  | **           |
| Fth1      | 8,678                           | 0,5576 | 10,47 | 0,7563 | 0,05    | ns           | 87,44                          | 0,7392 | 82,55 | 0,9345 | <0,0001 | ****         |
| Eef1a1    | 14,41                           | 0,5538 | 13,28 | 0,5514 | 0,1621  | ns           | 77,96                          | 0,8681 | 79,57 | 0,9426 | 0,2158  | ns           |
| Mdm2      | 11,9                            | 0,9328 | 16,33 | 1,084  | 0,0024  | **           | 81,77                          | 1,025  | 75,93 | 1,362  | 0,0008  | ***          |
| Gnb2l1    | 11,64                           | 0,9398 | 15,92 | 0,9353 | 0,0017  | **           | 79,85                          | 1,339  | 70,91 | 1,572  | <0,0001 | ****         |

**Table S4: Analysis of the density and distribution of PAP-enriched mRNAs in control mice and fear-conditioned mice.** Related to figure 6. AstroDot analysis for the density and distribution of mRNAs Ccnd2, Gnb2l1, Eef1a1, Mdm2, Fth1, and Ftl1 mRNAs in control and fear-conditioned mice. SEM: standard error of the mean;  $n \geq 35$  cells for all markers, three mice per condition. Unpaired two-tailed t-test.

| Gene name | PAP polysomal mRNAs in control conditions |           |           |         |        | PAP polysomal mRNAs upon fear |           |           |           |           |      |     | p-value  | significance |
|-----------|-------------------------------------------|-----------|-----------|---------|--------|-------------------------------|-----------|-----------|-----------|-----------|------|-----|----------|--------------|
|           | Extract 1                                 | Extract 2 | Extract 3 | Mean    | SEM    | Extract 1                     | Extract 2 | Extract 3 | Extract 4 | Extract 5 | Mean | SEM |          |              |
| Eef1a1    | 26667,8                                   | 309,6     | 13384,9   | 13454,1 | 7609,1 | 27,8                          | 17,1      | 6,1       | 11,1      | 9,6       | 14,3 | 3,8 | 1,00E-04 | ***          |
| Ccnd2     | 74,3                                      | 71,7      | 37,7      | 61,2    | 11,8   | 0,9                           | 0,6       | 0,3       | 0,3       | 0,2       | 0,5  | 0,1 | 0,02     | *            |
| Fth1      | 63,7                                      | 81,7      | 19,9      | 55,1    | 18,4   | 16,8                          | 17,1      | 9,7       | 17,3      | 12,4      | 14,7 | 1,5 | 0,02     | *            |
| Ftl1      | 95,1                                      | 75,5      | 15,8      | 62,1    | 23,9   | 1,5                           | 1,7       | 1,1       | 1,3       | 0,9       | 1,3  | 0,1 | 0,02     | *            |
| Gnb2l1    | 125,7                                     | 87,1      | 42,1      | 85,0    | 24,2   | 1,5                           | 2,1       | 1,1       | 2,0       | 2,6       | 1,9  | 0,3 | 0,02     | *            |
| Mdm2      | 24,4                                      | 17,6      | 9,1       | 17,0    | 4,4    | 0,1                           | 0,0       | 0,0       | 0,1       | 0,1       | 0,1  | 0,0 | 0,02     | *            |

| Gene name | Polysomal mRNAs from whole astrocytes in control conditions |           |           |      |      | Polysomal mRNAs from whole astrocytes upon fear |           |           |           |      |      |      | p-value | significance |
|-----------|-------------------------------------------------------------|-----------|-----------|------|------|-------------------------------------------------|-----------|-----------|-----------|------|------|------|---------|--------------|
|           | Extract 1                                                   | Extract 2 | Extract 3 | Mean | SEM  | Extract 1                                       | Extract 2 | Extract 3 | Extract 4 | Mean | SEM  |      |         |              |
| Eef1a1    | 4,1                                                         | 3,8       | 5,2       | 4,34 | 0,43 | 2,99                                            | 3,18      | 2,76      | 3,12      | 3,01 | 0,11 | 0,03 | *       |              |
| Ccnd2     | 0,08                                                        | 0,4       | 0,4       | 0,29 | 0,11 | 0,08                                            | 0,12      | 0,18      | 0,20      | 0,15 | 0,03 | 0,26 | ns      |              |
| Fth1      | 4,55                                                        | 1,29      | 3,45      | 3,10 | 0,96 | 2,43                                            | 1,21      | 2,72      | 3,03      | 2,35 | 0,46 | 0,20 | ns      |              |
| Ftl1      | 0,13                                                        | 0,05      | 0,11      | 0,10 | 0,02 | 0,09                                            | 0,13      | 0,24      | 0,12      | 0,15 | 0,04 | 0,23 | ns      |              |
| Gnb2l1    | 0,45                                                        | 0,58      | 0,97      | 0,67 | 0,16 | 0,77                                            | 0,67      | 0,41      | 0,72      | 0,64 | 0,09 | 0,50 | ns      |              |
| Mdm2      | 0,02                                                        | 0,02      | 0,01      | 0,02 | 0,00 | 0,04                                            | 0,01      | 0,00      | 0,00      | 0,01 | 0,01 | 0,20 | ns      |              |

**Table S5: qPCR analysis of dorsal hippocampus ribosome-bound mRNAs in whole astrocytes and PAPs in control and fear-conditioned mice.** *Related to figure 6.* SEM: standard error of the mean; \*,  $p \leq 0.05$ ; \*\*\*,  $p \leq 0.0001$ , ns: not significant in a one-tailed Mann-Whitney test; n = 3 to 5.
